# Supplementary material for: A dibenzo[a,c]phenazine-11,12-dicarbonitrile (DBPzDCN) acceptor based thermally activated delayed fluorescent compound for efficient near-infrared electroluminescent devices
Source: Royal Society of Chemistry journal article supplement (doi:10.1039/c8tc01746h), 2018-01-01
Supplement: c8tc01746h1.pdf [file c8tc01746h1.pdf]

## Supporting information

# **Dibenzo[a,c]phenazine-11,12-dicarbonitrile (DBPzDCN) Acceptor based Thermally Activated Delayed Fluorescent Compound for Efficient Near-Infrared Electroluminescent Devices**

Shipan Wang, Yang Miao, Xianju Yan, Kaiqi Ye\* and Yue Wang\*

*State Key Laboratory of Supramolecular Structure and Materials, College of Chemistry,  
Jilin University, Changchun 130012, P. R. China.*

\*Corresponding Author's E-mail: yekq@jlu.edu.cn (K. Ye); yuewang@jlu.edu.cn (Y.  
Wang).

### Contents

- 1. Analysis of Rate Constants**
- 2. Figures**
- 3. Tables**
- 4. References**

## 1. Analysis of Rate Constants

According to references S1-4, the rate equation for singlet and triplet exciton densities ( $[S_1]$  and  $[T_1]$ ) is described by

$$\frac{d[S_1]}{dt} = -(k_{r,S} + k_{nr,S} + k_{ISC})[S_1] + k_{RISC}[T_1] \quad (1)$$

$$\frac{d[T_1]}{dt} = -(k_{r,T} + k_{nr,T} + k_{RISC})[T_1] + k_{ISC}[S_1] \quad (2)$$

where  $k_{r,S}$ ,  $k_{nr,S}$  and  $k_{ISC}$  are the rate constants of radiative decay (fluorescence), intrinsic non-radiative decay (internal conversion) and ISC for the singlet excitons, respectively.  $k_{r,T}$ ,  $k_{nr,T}$ , and  $k_{RISC}$  are the rate constants of radiative decay (phosphorescence), intrinsic non-radiative decay and RISC of the triplet exciton, respectively.

The general solution for  $[S_1]$  is then:

$$[S_1] = C_p e^{-k_p t} + C_d e^{-k_d t} \quad (3)$$

where  $C_p$  and  $C_d$  are the intensities of the prompt and delayed fluorescence, respectively;  $k_p$  and  $k_d$  represent the decay rate constants for prompt and delayed fluorescence, respectively, and have the relationship of <sup>[S1-S3]</sup>

$$k_p, k_d = \frac{k_{r,S} + k_{nr,S} + k_{ISC} + k_{nr,T} + k_{RISC}}{2} \times \left( 1 \pm \sqrt{1 - \frac{4(k_{r,S} + k_{nr,S} + k_{ISC})(k_{nr,T} + k_{RISC}) - 4k_{ISC}k_{RISC}}{(k_{r,S} + k_{nr,S} + k_{ISC} + k_{nr,T} + k_{RISC})^2}} \right) \quad (4)$$

$$k_p + k_d = k_{r,S} + k_{nr,S} + k_{ISC} + k_{r,T} + k_{nr,T} + k_{RISC} \quad (5)$$

$$k_p k_d = (k_{r,S} + k_{nr,S} + k_{ISC})(k_{r,T} + k_{nr,T} + k_{RISC}) - k_{RISC} k_{ISC} \quad (6)$$

When there are negligible deactivation channels from  $T_1$ , the values of  $k_{r,S}$ ,  $k_{nr,S}$  and  $k_{ISC}$  are significantly larger than those of  $k_{r,T}$ ,  $k_{nr,T}$  and  $k_{RISC}$ . Generally,  $k_p \gg k_d$ , then  $k_p$  and  $k_d$

can be experimentally determined from prompt and delayed fluorescence decay time constants  $\tau_p$ ,  $\tau_d$  as follows:

$$k_p = \frac{1}{\tau_p} = k_{r,S} + k_{nr,S} + k_{ISC} \quad (7)$$

$$k_d = \frac{1}{\tau_d} = k_{nr,T} + \left( 1 - \frac{k_{ISC}}{k_{r,S} + k_{nr,S} + k_{ISC}} \right) k_{RISC} \quad (8)$$

The PL quantum efficiency of prompt fluorescence ( $\Phi_p$ ) and delayed fluorescence ( $\Phi_d$ ) are expressed by

$$\phi_p = \frac{k_{r,S}}{k_{r,S} + k_{nr,S} + k_{ISC}} = \frac{k_{r,S}}{k_p} \quad (9)$$

$$\phi_d = \sum_{k=1}^{\infty} (\phi_{ISC} \phi_{RISC})^k \phi_p = \frac{\phi_{ISC} \phi_{RISC}}{1 - \phi_{ISC} \phi_{RISC}} \quad (10)$$

where  $\Phi_{ISC}$  and  $\Phi_{RISC}$  are the intersystem crossing efficiency and reverse intersystem crossing efficiency, respectively, which can be expressed by the follow equations

$$\phi_{ISC} = \frac{k_{ISC}}{k_{r,S} + k_{nr,S} + k_{ISC}} = \frac{k_{ISC}}{k_p} \quad (11)$$

$$\phi_{RISC} = \frac{k_{RISC}}{k_{RISC} + k_{r,T} + k_{nr,T}} \quad (12)$$

By assuming  $k_{r,T} + k_{nr,T} \ll k_{RISC}$ , i.e. most of triplet states can return to singlet states through RISC and thus  $\Phi_{RISC} \sim 1$  and major non-radiative losses occur in singlet states, via equations (7)-(12) one obtains.

$$\phi_{ISC} = \frac{\phi_d}{\phi_p + \phi_d} \quad (13)$$

$$k_{ISC} = \frac{\phi_d}{\phi_p + \phi_d} k_p \quad (14)$$

$$k_{RISC} = \frac{k_d}{\left(1 - \frac{k_{ISC}}{k_p}\right)} = \frac{k_p k_d}{k_p - k_{ISC}} \quad (15)$$

## 2. Figures

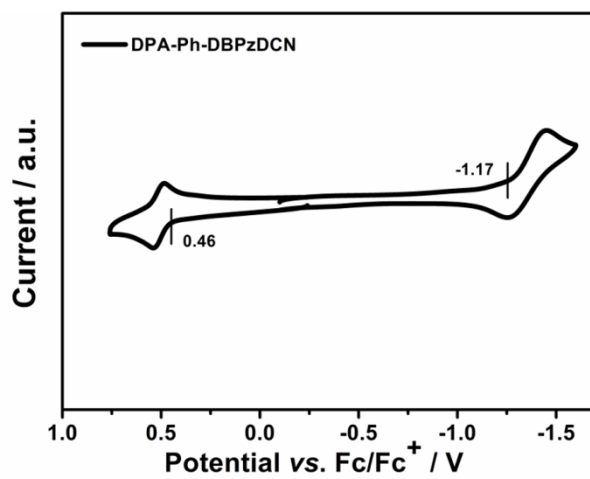

**Fig. S1** Cyclic voltammogram of DPA-Ph-DBPzDCN.

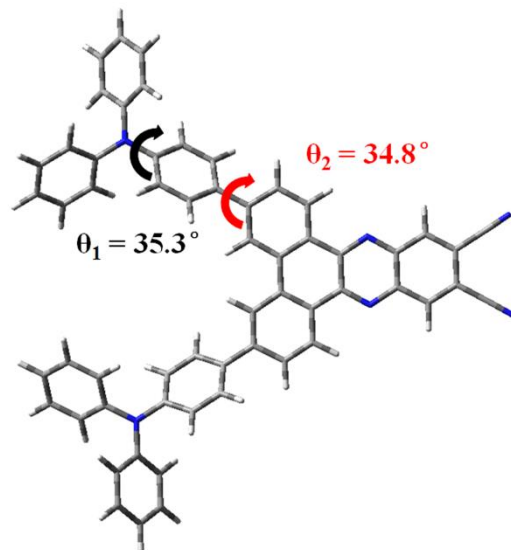

**Fig. S2** The  $S_0$  geometries of DPA-Ph-DBPzDCN optimized at the level of DFT/B3LYP/6-31G(d) in vacuum.

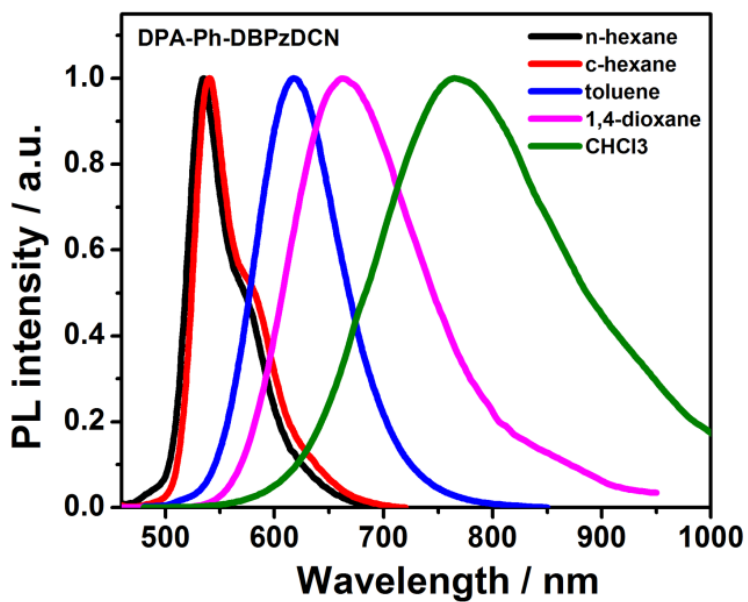

**Fig. S3** Normalized PL spectra of DPA-Ph-DBPzDCN in solvents with different polarity.

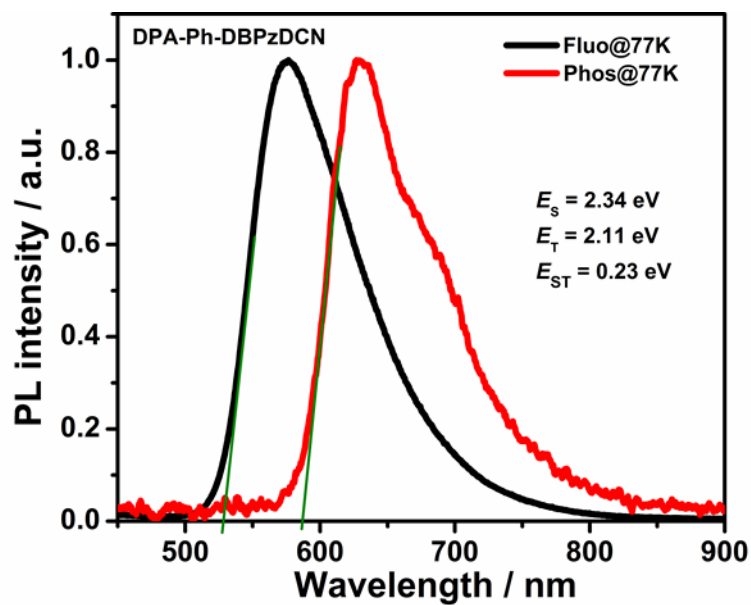

**Fig. S4** The fluorescence and phosphorescence spectra of DPA-Ph-DBPzDCN in toluene at 77 K.

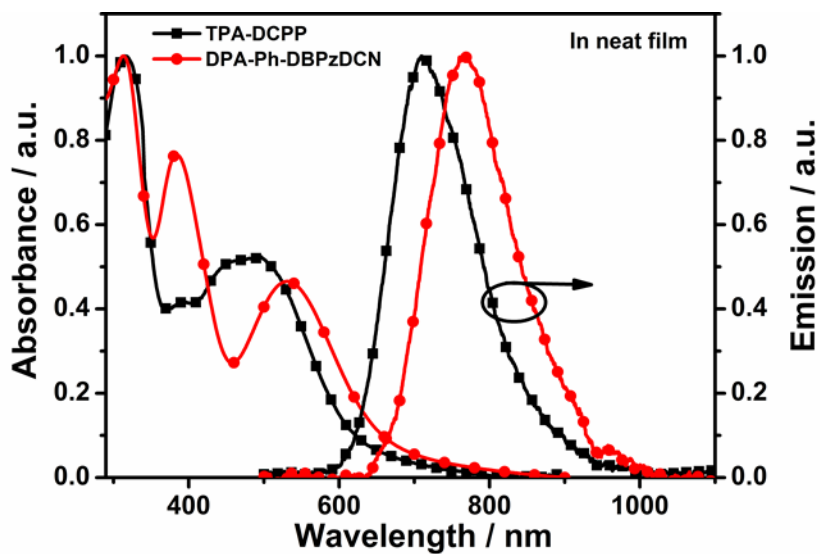

**Fig. S5** The absorption and fluorescence spectra of TPA-DCPP and DPA-Ph-DBPzDCN in neat film.

### 3. Tables

**Table S1.** Thermal, electrochemical and TD-DFT calculation data of DPA-Ph-DBPzDCN.

| compound       | $T_g^a/T_d^b$<br>[°C] | HOMO/LUMO <sup>c)</sup><br>[eV] | HOMO/LUMO <sup>d)</sup><br>[eV] | $S_1/T_1^e$<br>[eV] | $\Delta E_{ST}^e$<br>[eV] | $f^e$  |
|----------------|-----------------------|---------------------------------|---------------------------------|---------------------|---------------------------|--------|
| DPA-Ph-DBPzDCN | 177/533               | -5.21/-2.99                     | -5.26/-3.63                     | 1.9257/1.777        | 0.1487                    | 0.0744 |

<sup>a)</sup> Glass transition temperature; <sup>b)</sup> Decomposition temperature (5% weight loss); <sup>c)</sup> Estimated from DFT calculations; <sup>d)</sup> Measured by cyclic voltammetry in 0.1 M n-Bu<sub>4</sub>NPF<sub>6</sub> in CH<sub>2</sub>Cl<sub>2</sub> solution; <sup>e)</sup> Estimated from TD-DFT simulations.

**Table S2.** Photophysical properties of DPA-Ph-DBPzDCN.

| compound       | $\lambda_{abs, sol^a}/film^b$<br>[nm] | $\lambda_{PL, sol^a}/film^b$<br>[nm] | $\Phi_{PL, sol^c}/film^d$<br>[%] | $S_1/T_1^e$<br>[eV] | $\Delta E_{ST}^f$<br>[eV] |
|----------------|---------------------------------------|--------------------------------------|----------------------------------|---------------------|---------------------------|
| DPA-Ph-DBPzDCN | 490/530                               | 618/765                              | 91/2                             | 2.34/2.11           | 0.23                      |

<sup>a)</sup> The longest peak wavelength of absorption and PL measured in toluene; <sup>b)</sup> The longest peak wavelength of absorption and PL measured in neat film; <sup>c)</sup> absolute PL quantum yield ( $\Phi_{PL}$ ) evaluated using an integrating sphere in toluene after N<sub>2</sub> bubbling; <sup>d)</sup>  $\Phi_{PL}$  of investigated molecule in neat film; <sup>e)</sup>  $S_1$  and  $T_1$  estimated from onsets of the fluorescence and phosphorescence spectra in toluene at 77K, respectively. <sup>f)</sup>  $\Delta E_{ST} = S_1 - T_1$ .

**Table S3.** The summary of rate constants for DPA-Ph-DBPzDCN films with different doping concentrations.

| Concentration | $\lambda_{PL}$ | $\Phi$ | $\Phi_p/\Phi_d$ | $\tau_p^a$<br>[ns] | $\tau_d$<br>[us] | $k_p$<br>[ $\times 10^7 s^{-1}$ ] | $k_d$<br>[ $\times 10^4 s^{-1}$ ] | $k_{r,S}$<br>[ $\times 10^7 s^{-1}$ ] | $k_{nr,S}$<br>[ $\times 10^7 s^{-1}$ ] | $k_{ISC}$<br>[ $\times 10^7 s^{-1}$ ] | $k_{RISC}$<br>[ $\times 10^4 s^{-1}$ ] |
|---------------|----------------|--------|-----------------|--------------------|------------------|-----------------------------------|-----------------------------------|---------------------------------------|----------------------------------------|---------------------------------------|----------------------------------------|
| 6 wt%         | 674            | 0.39   | 0.31/0.08       | 14.3               | 296.5            | 7.0                               | 0.34                              | 2.2                                   | 3.4                                    | 1.4                                   | 0.43                                   |
| 10 wt%        | 690            | 0.32   | 0.29/0.03       | 21.5               | 145.8            | 4.7                               | 0.69                              | 1.3                                   | 2.9                                    | 0.44                                  | 0.76                                   |
| 20 wt%        | 705            | 0.25   | 0.23/0.02       | 23.9               | 121.9            | 4.2                               | 0.82                              | 0.96                                  | 2.9                                    | 0.33                                  | 0.89                                   |
| 30 wt%        | 728            | 0.14   | 0.13/0.01       | 25.3               | 101.1            | 4.0                               | 0.99                              | 0.51                                  | 3.2                                    | 0.28                                  | 1.1                                    |

<sup>a)</sup> Average lifetime calculated by  $\tau_{av} = \sum A_i \tau_i^2 / \sum A_i \tau_i$ , where  $A_i$  is the pre-exponential for lifetime  $\tau_i$ .

#### 4. Reference:

- [S1] M. A. Baldo, and S. R. Forrest, Transient analysis of organic electrophosphorescence: I. Transient analysis of triplet energy transfer. *Phys. Rev. B*, 2000, **62**, 10958.
- [S2] K. Goushi, K. Yoshida, K. Sato and C. Adachi, *Nat. Photonics*, 2012, **6**, 253.
- [S3] H. Wang, L. Xie, Q. Peng, L. Meng, Y. Wang, Y. Yi and P. Wang, *Adv. Mater.*, 2014, **26**, 5198.
- [S4] K.-C. Pan, S.-W. Li, Y.-Y. Ho, Y.-J. Shiu, W.-L. Tsai, M. Jiao, W.-K. Lee, C.-C. Wu, C.-L. Chung, T. Chatterjee, Y.-S. Li, K.-T. Wong, H.-C. Hu, C.-C. Chen and M.-T. Lee, *Adv. Funct. Mater.*, 2016, **26**, 7560.
